# Supplementary material
Source: HighWire-hosted journal article supplement (https://oem.bmj.com/content/76/9/660)
Supplement: inline-supplementary-material-1 [file inline-supplementary-material-1.pdf]

## **Text A - Questions in questionnaire**

### *Psychosocial factors – full description.*

The current study assessed decision control, fair and empowering leadership and social climate using items taken from the General Nordic Questionnaire for Psychological and Social Factors at work (QPS<sub>Nordic</sub>) (32), a validated instrument for research and tool for employers to monitor and improve working conditions (32, 33). For each of the four subjects a mean was calculated based on the responses.

Participants were asked for decision control at work through the five questions: 1) *If there are alternative methods for doing your work, can you choose which method to use?* 2) *Can you influence the amount of work assigned to you?* 3) *Can you influence decisions concerning the persons you will need to collaborate with?* 4) *Can you decide when to be in contact with clients?* 5) *Can you influence decisions that are important for your work?* Response alternatives (1-5) were *very seldom or never, rather seldom, sometimes, rather often* and *very often or always*.

Three questions investigated empowering leadership: 1) *Does your immediate superior encourage you to participate in important decisions?* 2) *Does your immediate superior encourage you to speak up, when you have different opinions?* 3) *Does your immediate superior help you to develop your skills?* Response alternatives (1-5) were *very seldom or never, rather seldom, sometimes, rather often* and *very often or always*.

For fair leadership we used the three questions: 1) *Does your immediate superior distribute the work fairly and impartially?* 2) *Does your immediate superior treat the workers fairly and equally?* 3) *Is the relationship between you and your immediate superior a source of stress to you?* Response alternatives (1-5) were *very seldom or never, rather seldom, sometimes, rather often* and *very often or always*.

We asked for social climate in participants work unit through three questions: *What is the climate like in your work unit?* Items asked for were: 1) *Encouraging and supportive*, 2) *Distrustful and suspicious*, 3) *Relaxed and comfortable*. Response alternatives (1-5) were *very little or not at all, rather little, somewhat, rather much* and *very much*.

**Table A. Linear mixed model on  $\geq 30^\circ$  and  $\geq 60^\circ$  forward bending exposure at work (percentage) and average low back pain during follow-up (Design 1).**

|                                   | <u>Model 1</u>             |               |              | <u>Model 2</u>             |               |              | <u>Model 3</u>             |               |              | <u>Model 4</u>             |               |              | <u>Model 5</u>             |                |              |
|-----------------------------------|----------------------------|---------------|--------------|----------------------------|---------------|--------------|----------------------------|---------------|--------------|----------------------------|---------------|--------------|----------------------------|----------------|--------------|
|                                   | Observations = 291/141/150 |               |              | Observations = 285/140/145 |               |              | Observations = 284/139/145 |               |              | Observations = 281/138/143 |               |              | Observations = 281/138/143 |                |              |
|                                   | Coef.                      | 95% CI        | P-value      | Coef.                      | 95% CI         | P-value      |
| <b><math>\geq 30^\circ</math></b> |                            |               |              |                            |               |              |                            |               |              |                            |               |              |                            |                |              |
| Total                             | -0.530                     | -2.248,1.189  | 0.546        | -0.832                     | -2.602,0.937  | 0.357        | -0.817                     | -2.600,0.966  | 0.369        | -0.793                     | -2.533,0.947  | 0.372        | -1.432                     | -3.144,0.280   | 0.101        |
| Construction                      | -2.180                     | -4.293,-0.067 | <b>0.043</b> | -2.417                     | -4.599,-0.235 | <b>0.030</b> | -2.373                     | -4.581,-0.166 | <b>0.035</b> | -2.376                     | -4.447,-0.306 | <b>0.025</b> | -2.580                     | -4.691,-0.468  | <b>0.017</b> |
| Healthcare                        | 1.643                      | -1.062,4.348  | 0.234        | 1.540                      | -1.386,4.466  | 0.302        | 1.547                      | -1.334,4.428  | 0.292        | 1.625                      | -1.375,4.625  | 0.288        | 0.332                      | -2.729,3.394   | 0.831        |
| <b><math>\geq 60^\circ</math></b> |                            |               |              |                            |               |              |                            |               |              |                            |               |              |                            |                |              |
| Total                             | 0.393                      | -3.496,4.281  | 0.843        | 0.103                      | -4.005,4.212  | 0.961        | 0.369                      | -3.834,4.572  | 0.863        | 0.508                      | -3.660,4.676  | 0.811        | -3.904                     | -8.589,0.780   | 0.102        |
| Construction                      | -1.033                     | -5.346,3.280  | 0.639        | -1.835                     | -6.429,2.760  | 0.434        | -1.365                     | -6.062,3.332  | 0.569        | -3.055                     | -7.728,1.617  | 0.200        | -5.237                     | -10.593,0.118  | 0.055        |
| Healthcare                        | 8.106                      | -1.556,17.768 | 0.100        | 8.263                      | -2.123,18.645 | 0.119        | 0.817                      | -2.064,18.414 | 0.118        | 8.115                      | -2.337,18.567 | 0.128        | -1.136                     | -13.961,11.691 | 0.862        |

Observations: total observations included in linear mixed models for total/construction/health care; P-values  $\leq 0.05$  in bold

Dependent variable: average pain intensity from 6 months to 24 months follow-up (T2, T3, T4, T5)

Independent variables:

Model 1: Forward bending at work (percentage of work day)

Model 2: As model 1 + Age, Gender, Smoking, BMI

Model 3: As model 2 + Heavy lifting

Model 4: As model 3 + Social climate, Decision control, Fair leadership, Empowering leadership

Model 5: As model 4 + Objectively measured sitting at work (percentage of work day).

**Table B. Linear mixed model with exposure to forward bending  $\geq 30^\circ$  at work (percentage) and change in low back pain during follow-up (Design 2).**

|              |    | <u>Model 1</u>             |              |              | <u>Model 2</u> |              |              | <u>Model 3</u>             |              |              | <u>Model 4</u> |              |              | <u>Model 5</u>             |              |              |       |        |         |                            |  |  |  |  |  |                            |  |  |  |  |  |
|--------------|----|----------------------------|--------------|--------------|----------------|--------------|--------------|----------------------------|--------------|--------------|----------------|--------------|--------------|----------------------------|--------------|--------------|-------|--------|---------|----------------------------|--|--|--|--|--|----------------------------|--|--|--|--|--|
|              |    | Observations = 407/197/210 |              |              |                |              |              | Observations = 399/196/203 |              |              |                |              |              | Observations = 398/195/203 |              |              |       |        |         | Observations = 393/194/199 |  |  |  |  |  | Observations = 393/194/199 |  |  |  |  |  |
|              |    | Coef.                      | 95% CI       | P-value      | Coef.          | 95% CI       | P-value      | Coef.                      | 95% CI       | P-value      | Coef.          | 95% CI       | P-value      | Coef.                      | 95% CI       | P-value      | Coef. | 95% CI | P-value |                            |  |  |  |  |  |                            |  |  |  |  |  |
| Total        | T2 | 0.809                      | -1.186,2.804 | 0.427        | 0.822          | -1.177,2.822 | 0.420        | 0.781                      | -1.219,2.781 | 0.444        | 0.750          | -1.239,2.739 | 0.460        | 0.654                      | -1.325,2.633 | 0.517        |       |        |         |                            |  |  |  |  |  |                            |  |  |  |  |  |
|              | T3 | 0.631                      | -1.498,2.760 | 0.561        | 0.599          | -1.532,2.729 | 0.582        | 0.541                      | -1.591,2.674 | 0.619        | 0.561          | -1.556,2.678 | 0.603        | 0.436                      | -1.671,2.543 | 0.685        |       |        |         |                            |  |  |  |  |  |                            |  |  |  |  |  |
|              | T4 | 1.557                      | -0.504,3.618 | 0.139        | 1.350          | -0.763,3.463 | 0.210        | 1.299                      | -0.815,3.413 | 0.229        | 1.286          | -0.814,3.386 | 0.230        | 1.166                      | -0.924,3.256 | 0.274        |       |        |         |                            |  |  |  |  |  |                            |  |  |  |  |  |
|              | T5 | 0.720                      | -1.587,3.026 | 0.541        | 0.727          | -1.580,3.034 | 0.537        | 0.738                      | -1.569,3.045 | 0.531        | 0.732          | -1.558,3.022 | 0.531        | 0.560                      | -1.719,2.839 | 0.630        |       |        |         |                            |  |  |  |  |  |                            |  |  |  |  |  |
| Construction | T2 | -1.776                     | -4.381,0.870 | 0.190        | -1.859         | -4.419,0.701 | 0.155        | -2.026                     | -4.554,0.502 | 0.116        | -1.941         | -4.480,0.599 | 0.134        | -1.982                     | -4.519,0.545 | 0.126        |       |        |         |                            |  |  |  |  |  |                            |  |  |  |  |  |
|              | T3 | -1.797                     | -4.602,1.008 | 0.209        | -1.995         | -4.730,0.740 | 0.153        | -2.157                     | -4.857,0.543 | 0.117        | -1.980         | -4.699,0.740 | 0.154        | -1.990                     | -4.703,0.725 | 0.151        |       |        |         |                            |  |  |  |  |  |                            |  |  |  |  |  |
|              | T4 | -0.119                     | -2.767,2.529 | 0.930        | -0.877         | -3.506,1.752 | 0.513        | -1.083                     | -3.680,1.515 | 0.414        | -1.034         | -3.641,1.573 | 0.437        | -1.077                     | -3.681,1.528 | 0.418        |       |        |         |                            |  |  |  |  |  |                            |  |  |  |  |  |
|              | T5 | 0.118                      | -3.007,3.243 | 0.941        | 0.248          | -2.832,3.327 | 0.875        | 0.415                      | -2.624,3.454 | 0.789        | 0.450          | -2.603,3.503 | 0.773        | 0.406                      | -2.644,3.455 | 0.794        |       |        |         |                            |  |  |  |  |  |                            |  |  |  |  |  |
| Healthcare   | T2 | 4.266                      | 1.203,7.204  | <b>0.004</b> | 4.416          | 1.429,7.403  | <b>0.004</b> | 4.492                      | 1.498,7.485  | <b>0.003</b> | 4.442          | 1.476,7.408  | <b>0.003</b> | 4.296                      | 1.348,7.244  | <b>0.004</b> |       |        |         |                            |  |  |  |  |  |                            |  |  |  |  |  |
|              | T3 | 3.960                      | 0.818,7.101  | <b>0.014</b> | 4.023          | 0.837,7.209  | <b>0.013</b> | 4.224                      | 1.025,7.424  | <b>0.010</b> | 4.210          | 1.040,7.380  | <b>0.009</b> | 3.889                      | 0.734,7.045  | <b>0.016</b> |       |        |         |                            |  |  |  |  |  |                            |  |  |  |  |  |
|              | T4 | 4.077                      | 0.948,7.206  | <b>0.011</b> | 4.499          | 1.203,7.794  | <b>0.007</b> | 4.591                      | 1.289,7.892  | <b>0.006</b> | 4.545          | 1.285,7.804  | <b>0.006</b> | 4.330                      | 1.088,7.572  | <b>0.009</b> |       |        |         |                            |  |  |  |  |  |                            |  |  |  |  |  |
|              | T5 | 2.259                      | -1.056,5.573 | 0.182        | 2.264          | -1.089,5.618 | 0.186        | 2.245                      | -1.114,5.603 | 0.190        | 2.224          | -1.070,5.556 | 0.185        | 1.964                      | -1.331,5.260 | 0.243        |       |        |         |                            |  |  |  |  |  |                            |  |  |  |  |  |

T2: 6 months, T3: 12 months, T4: 18 months, T5: 24 months; Observations: total observations included in models for total/construction/healthcare; P-values  $\leq 0.05$  in bold.

Dependent variable: Change in pain between T1 and TX. Independent variables:

Model 1: Forward bending at work (percentage of work day)

Model 2: As model 1 + Age, Gender, Smoking, BMI

Model 3: As model 2 + Heavy lifting

Model 4: As model 3 + Social climate, Decision control, Fair leadership, Empowering leadership

Model 5: As model 4 + Objectively measured sitting at work (percentage of work day).

**Table C. Linear mixed model with exposure to forward bending  $\geq 60^\circ$  at work (percentage) and change in low back pain during follow-up (Design 2).**

|            |              | <u>Model 1</u>             |               |              | <u>Model 2</u>             |               |              | <u>Model 3</u>             |               |              | <u>Model 4</u>             |               |              | <u>Model 5</u>             |               |              |
|------------|--------------|----------------------------|---------------|--------------|----------------------------|---------------|--------------|----------------------------|---------------|--------------|----------------------------|---------------|--------------|----------------------------|---------------|--------------|
|            |              | Observations = 407/197/210 |               |              | Observations = 399/196/203 |               |              | Observations = 398/195/203 |               |              | Observations = 393/194/199 |               |              | Observations = 393/194/199 |               |              |
|            |              | Coef.                      | 95% CI        | P-value      |
| Total      | T2           | -1.631                     | -6.214,2.952  | 0.485        | -1.439                     | -6.025,3.148  | 0.539        | -1.577                     | -6.164,3.009  | 0.732        | -1.492                     | -6.085,3.102  | 0.524        | -1.723                     | -6.301,2.854  | 0.461        |
|            | T3           | -0.580                     | -5.289,4.129  | 0.809        | -0.444                     | -5.166,4.278  | 0.854        | -0.751                     | -5.508,4.007  | 0.769        | -0.601                     | -5.358,4.156  | 0.804        | -1.043                     | -5.789,3.702  | 0.667        |
|            | T4           | 1.624                      | -3.003,6.252  | 0.491        | 1.381                      | -3.281,6.044  | 0.562        | 1.041                      | -3.669,5.751  | 0.399        | 0.924                      | -3.789,5.637  | 0.701        | 0.501                      | -4.200,5.202  | 0.835        |
|            | T5           | 2.174                      | -2.977,7.324  | 0.408        | 2.448                      | -2.710,7.605  | 0.352        | 2.346                      | -2.820,7.512  | 0.094        | 2.412                      | -2.803,7.626  | 0.365        | 2.225                      | -2.970,7.419  | 0.401        |
|            | Construction | T2                         | -3.583        | -8.866,1.700 | 0.184                      | -3.714        | -8.877,1.450 | 0.159                      | -4.129        | -9.235,0.978 | 0.113                      | -4.308        | -9.464,0.848 | 0.101                      | -4.381        | -9.529,0.766 |
|            | T3           | -3.155                     | -8.599,2.290  | 0.256        | -3.537                     | -8.858,1.785  | 0.193        | -4.253                     | -9.543,1.037  | 0.115        | -4.018                     | -9.334,1.298  | 0.139        | -4.109                     | -9.416,1.199  | 0.129        |
|            | T4           | 0.467                      | -4.867,5.801  | 0.864        | -0.660                     | -5.922,4.603  | 0.806        | -1.614                     | -6.880,3.652  | 0.548        | -1.797                     | -7.100,3.506  | 0.507        | -1.955                     | -7.255,3.344  | 0.470        |
|            | T5           | 0.457                      | -5.451,6.366  | 0.879        | 0.572                      | -5.230,6.373  | 0.847        | 0.341                      | -5.386,6.067  | 0.907        | 0.597                      | -5.156,6.350  | 0.839        | 0.573                      | -5.167,6.314  | 0.845        |
| Healthcare | T2           | 6.717                      | -3.599,17.032 | 0.202        | 7.562                      | -2.932,18.056 | 0.158        | 7.984                      | -2.538,18.505 | 0.137        | 8.139                      | -2.754,19.032 | 0.143        | 7.358                      | -3.491,18.206 | 0.184        |
|            | T3           | 8.851                      | -2.062,19.763 | 0.112        | 10.237                     | -1.111,21.584 | 0.077        | 11.307                     | -0.123,22.737 | 0.053        | 10.935                     | -0.950,22.821 | 0.071        | 9.454                      | -2.416,21.323 | 0.119        |
|            | T4           | 4.370                      | -6.501,15.241 | 0.431        | 5.147                      | -6.335,16.629 | 0.380        | 5.715                      | -5.796,17.227 | 0.330        | 5.354                      | -6.520,17.228 | 0.377        | 4.244                      | -7.593,16.082 | 0.482        |
|            | T5           | 6.726                      | -5.511,18.963 | 0.281        | 6.551                      | -5.940,19.041 | 0.304        | 6.363                      | -6.145,18.871 | 0.319        | 6.408                      | -6.780,19.596 | 0.341        | 5.311                      | -7.827,18.449 | 0.428        |

T2: 6 months, T3: 12 months, T4: 18 months, T5: 24 months; Observations: total observations included in models for total/construction/healthcare

Dependent variable: Change in pain between T1 and TX. Independent variables:

Model 1: Forward bending at work (percentage of work day)

Model 2: As model 1 + Age, Gender, Smoking, BMI

Model 3: As model 2 + Heavy lifting

Model 4: As model 3 + Social climate, Decision control, Fair leadership, Empowering leadership

Model 5: As model 4 + Objectively measured sitting at work (percentage of work day).
